# Supplementary material for: iPAINT: a general approach tailored to image the topology of interfaces with nanometer resolution
Source: Royal Society of Chemistry journal article supplement (doi:10.1039/c6nr00445h), 2016-01-01

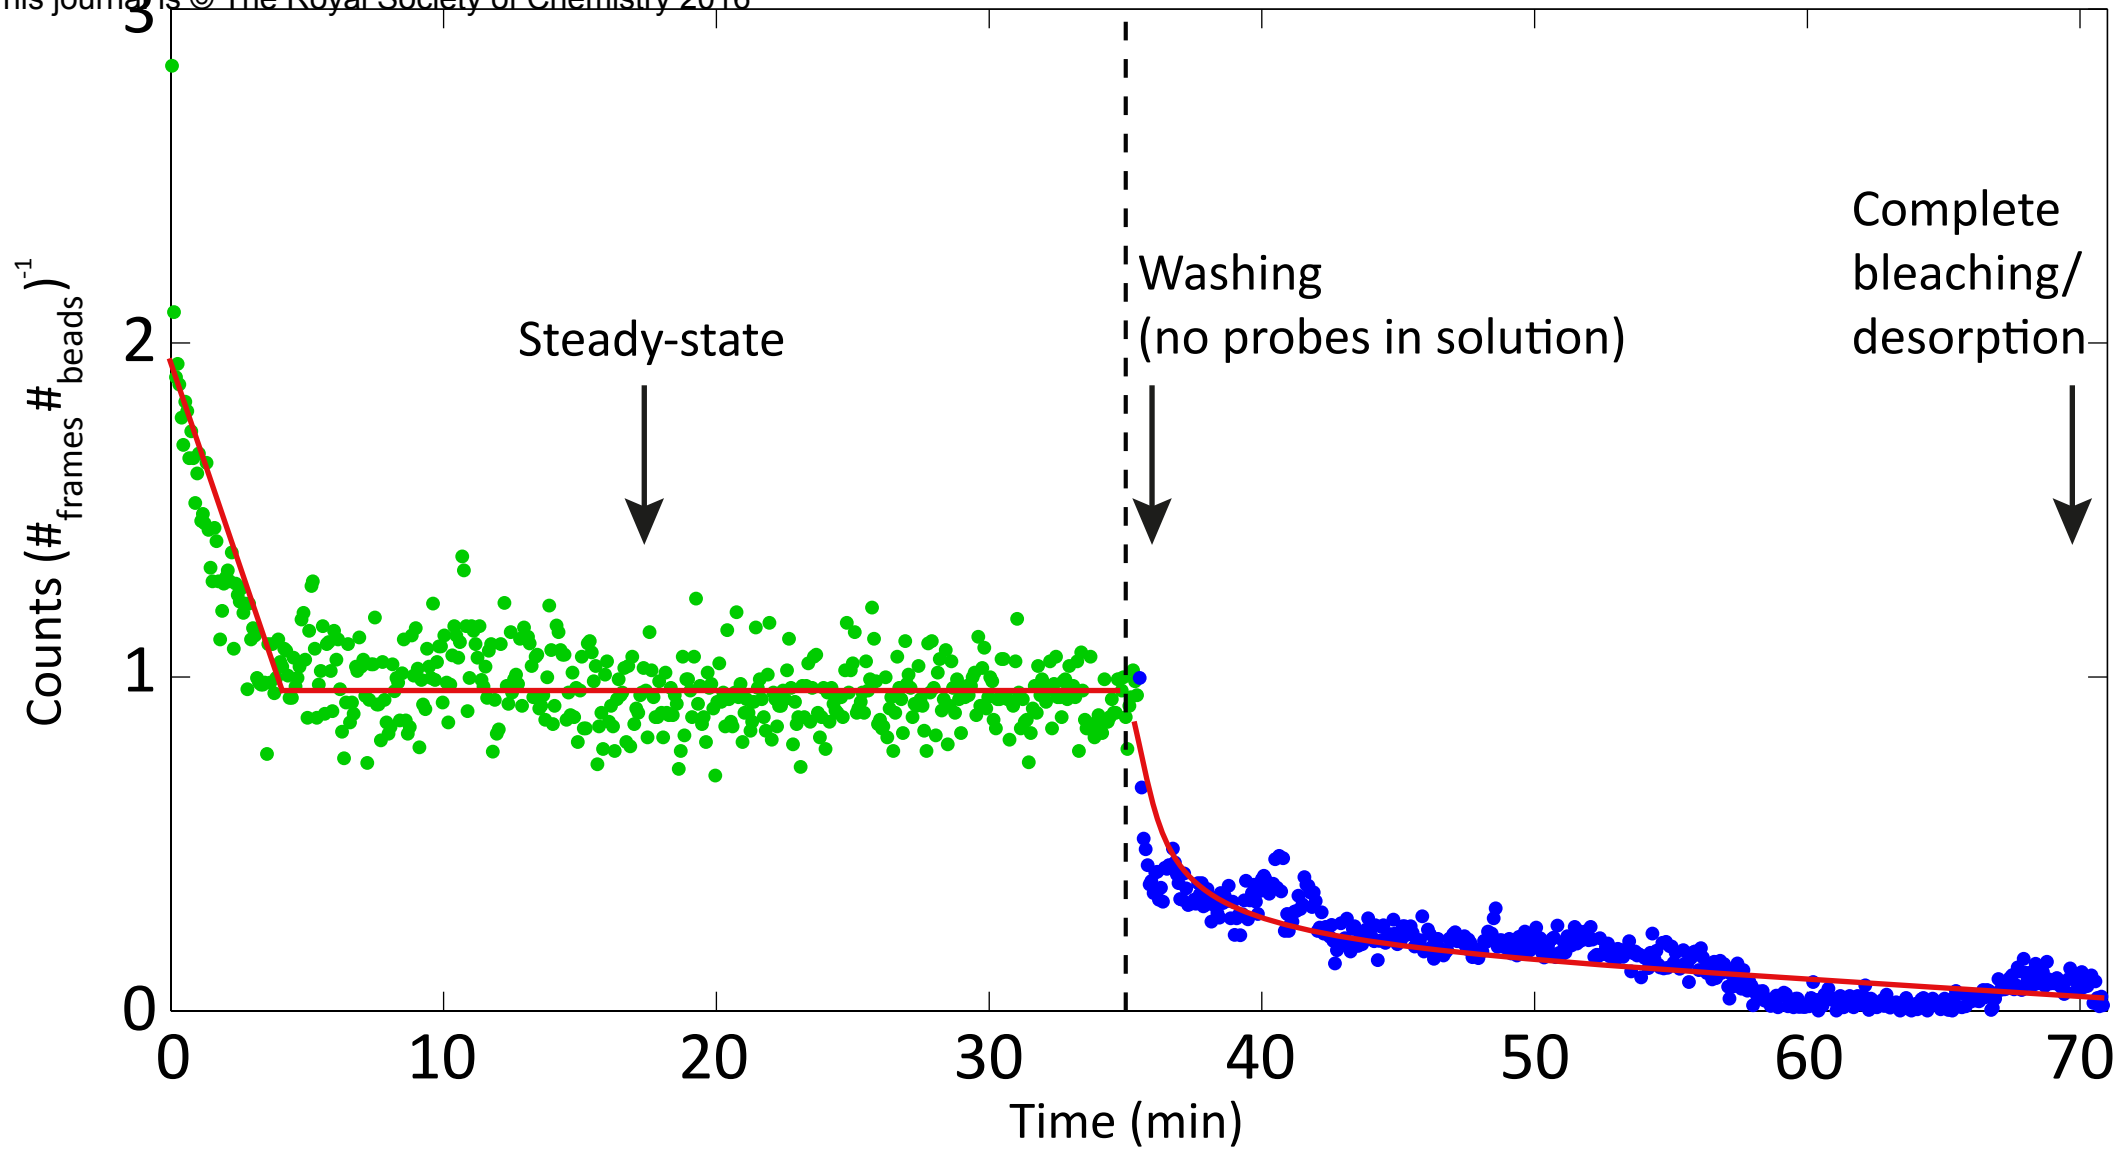

Supplement: c6nr00445h4.pdf [file c6nr00445h4.pdf]
